# Supplementary material for: Reference Intervals for Non-Fasting CVD Lipids and Inflammation Markers in Pregnant Indigenous Australian Women
Source: PubMed Central journal article supplement (PMC5746706; doi:10.3390/healthcare5040072), 2017-10-14

# Supplementary Materials: Reference Intervals for Non-Fasting CVD Lipids and Inflammation Markers in Pregnant Indigenous Australian Women

Tracy L. Schumacher, Christopher Oldmeadow, Don Clausen, Loretta Weatherall, Lyniece Keogh, Kirsty G. Pringle and Kym M. Rae

**Table S 1: Distributions, fractional polynomial terms and goodness of fit values used in creating of reference ranges.**

| CVD factor        | Distribution | Fractional polynomial terms |   |    | Goodness of fit (p) |                            |
|-------------------|--------------|-----------------------------|---|----|---------------------|----------------------------|
|                   |              | M                           | S | G  |                     |                            |
| Cholesterol       | men          | -0.5                        | 3 | -1 | 0                   | 0.362                      |
| Triglycerides     | men          | -2                          | 2 | 2  | 0                   | 0.366                      |
| Cystatin-C        | men          | 2                           | 2 | 3  | 0                   | 0.358                      |
| ALP (16-22 years) | en           | 3                           | 3 | 3  | 0                   | 0.583                      |
| ALP (22+ years)   | en           | 2                           | 3 | 3  | 0                   | Not available <sup>1</sup> |

<sup>1</sup> Insufficient degrees of freedom for test of means. Results for the ranges provided for ALP 16-22 years should be treated with caution.

**Table S 2. Non-fasting total cholesterol <sup>1</sup>percentiles for Indigenous Australian women during pregnancy**

| Gestation week | 2.5 <sup>th</sup> | 5 <sup>th</sup> | 10 <sup>th</sup> | 25 <sup>th</sup> | 50 <sup>th</sup> | 75 <sup>th</sup> | 90 <sup>th</sup> | 95 <sup>th</sup> | 97.5 <sup>th</sup> |
|----------------|-------------------|-----------------|------------------|------------------|------------------|------------------|------------------|------------------|--------------------|
| 12             | 3.60              | 3.72            | 3.87             | 4.19             | 4.68             | 5.26             | 5.78             | 6.09             | 6.38               |
| 13             | 3.63              | 3.76            | 3.93             | 4.27             | 4.81             | 5.45             | 6.00             | 6.34             | 6.64               |
| 14             | 3.65              | 3.80            | 3.98             | 4.35             | 4.93             | 5.61             | 6.19             | 6.55             | 6.86               |
| 15             | 3.68              | 3.84            | 4.04             | 4.43             | 5.04             | 5.76             | 6.37             | 6.73             | 7.06               |
| 16             | 3.71              | 3.88            | 4.09             | 4.50             | 5.14             | 5.89             | 6.52             | 6.90             | 7.23               |
| 17             | 3.74              | 3.92            | 4.13             | 4.57             | 5.24             | 6.01             | 6.66             | 7.05             | 7.39               |
| 18             | 3.77              | 3.95            | 4.18             | 4.63             | 5.33             | 6.13             | 6.79             | 7.19             | 7.53               |
| 19             | 3.81              | 3.99            | 4.23             | 4.70             | 5.41             | 6.23             | 6.91             | 7.31             | 7.66               |
| 20             | 3.84              | 4.03            | 4.27             | 4.76             | 5.49             | 6.33             | 7.02             | 7.43             | 7.78               |
| 21             | 3.87              | 4.07            | 4.32             | 4.82             | 5.57             | 6.43             | 7.13             | 7.54             | 7.90               |
| 22             | 3.90              | 4.11            | 4.37             | 4.87             | 5.65             | 6.52             | 7.23             | 7.64             | 8.00               |
| 23             | 3.94              | 4.15            | 4.41             | 4.93             | 5.72             | 6.60             | 7.32             | 7.74             | 8.10               |
| 24             | 3.97              | 4.19            | 4.46             | 4.99             | 5.79             | 6.69             | 7.41             | 7.83             | 8.20               |
| 25             | 4.01              | 4.23            | 4.50             | 5.05             | 5.86             | 6.77             | 7.50             | 7.92             | 8.29               |
| 26             | 4.05              | 4.27            | 4.55             | 5.10             | 5.93             | 6.85             | 7.59             | 8.01             | 8.38               |
| 27             | 4.09              | 4.31            | 4.60             | 5.16             | 6.00             | 6.93             | 7.67             | 8.10             | 8.46               |
| 28             | 4.13              | 4.36            | 4.65             | 5.22             | 6.07             | 7.01             | 7.75             | 8.18             | 8.55               |
| 29             | 4.17              | 4.41            | 4.70             | 5.28             | 6.14             | 7.08             | 7.83             | 8.26             | 8.63               |
| 30             | 4.22              | 4.45            | 4.76             | 5.34             | 6.21             | 7.16             | 7.91             | 8.34             | 8.71               |
| 31             | 4.26              | 4.50            | 4.81             | 5.40             | 6.28             | 7.24             | 8.00             | 8.43             | 8.79               |
| 32             | 4.31              | 4.56            | 4.87             | 5.47             | 6.35             | 7.32             | 8.08             | 8.51             | 8.87               |
| 33             | 4.36              | 4.61            | 4.92             | 5.53             | 6.42             | 7.39             | 8.16             | 8.59             | 8.95               |
| 34             | 4.42              | 4.67            | 4.98             | 5.60             | 6.50             | 7.47             | 8.24             | 8.67             | 9.04               |
| 35             | 4.47              | 4.73            | 5.05             | 5.66             | 6.57             | 7.55             | 8.32             | 8.75             | 9.12               |
| 36             | 4.53              | 4.79            | 5.11             | 5.73             | 6.65             | 7.64             | 8.4              | 8.84             | 9.20               |
| 37             | 4.59              | 4.85            | 5.18             | 5.81             | 6.73             | 7.72             | 8.49             | 8.92             | 9.29               |
| 38             | 4.65              | 4.92            | 5.25             | 5.88             | 6.81             | 7.80             | 8.58             | 9.01             | 9.37               |
| 39             | 4.72              | 4.98            | 5.32             | 5.96             | 6.89             | 7.89             | 8.66             | 9.10             | 9.46               |
| 40             | 4.79              | 5.06            | 5.39             | 6.04             | 6.98             | 7.98             | 8.75             | 9.19             | 9.55               |

<sup>1</sup>reference range for non-pregnant women: <5.5mmol/L [21]

**Table S 3. Non-fasting triglycerides<sup>1</sup> percentiles for Indigenous Australian women during pregnancy**

| Gestation week | 2.5 <sup>th</sup> | 5 <sup>th</sup> | 10 <sup>th</sup> | 25 <sup>th</sup> | 50 <sup>th</sup> | 75 <sup>th</sup> | 90 <sup>th</sup> | 95 <sup>th</sup> | 97.5 <sup>th</sup> |
|----------------|-------------------|-----------------|------------------|------------------|------------------|------------------|------------------|------------------|--------------------|
| 12             | 0.75              | 0.84            | 0.95             | 1.15             | 1.40             | 1.70             | 2.05             | 2.32             | 2.61               |
| 13             | 0.77              | 0.86            | 0.97             | 1.18             | 1.43             | 1.74             | 2.10             | 2.38             | 2.68               |
| 14             | 0.79              | 0.89            | 1.00             | 1.21             | 1.47             | 1.78             | 2.16             | 2.45             | 2.76               |
| 15             | 0.82              | 0.91            | 1.03             | 1.24             | 1.51             | 1.83             | 2.22             | 2.52             | 2.85               |
| 16             | 0.84              | 0.94            | 1.06             | 1.28             | 1.55             | 1.89             | 2.29             | 2.60             | 2.94               |
| 17             | 0.87              | 0.97            | 1.09             | 1.31             | 1.59             | 1.94             | 2.36             | 2.68             | 3.03               |
| 18             | 0.89              | 1.00            | 1.12             | 1.35             | 1.64             | 2.00             | 2.43             | 2.76             | 3.14               |
| 19             | 0.92              | 1.03            | 1.16             | 1.39             | 1.69             | 2.06             | 2.50             | 2.85             | 3.24               |
| 20             | 0.95              | 1.06            | 1.19             | 1.44             | 1.74             | 2.12             | 2.58             | 2.95             | 3.35               |
| 21             | 0.98              | 1.10            | 1.23             | 1.48             | 1.80             | 2.19             | 2.67             | 3.05             | 3.47               |
| 22             | 1.02              | 1.13            | 1.27             | 1.53             | 1.86             | 2.26             | 2.76             | 3.15             | 3.59               |
| 23             | 1.05              | 1.17            | 1.31             | 1.58             | 1.92             | 2.34             | 2.85             | 3.26             | 3.72               |
| 24             | 1.09              | 1.21            | 1.36             | 1.63             | 1.98             | 2.41             | 2.95             | 3.37             | 3.85               |
| 25             | 1.12              | 1.25            | 1.40             | 1.69             | 2.05             | 2.49             | 3.05             | 3.49             | 3.99               |
| 26             | 1.16              | 1.29            | 1.45             | 1.74             | 2.11             | 2.58             | 3.15             | 3.61             | 4.14               |
| 27             | 1.20              | 1.34            | 1.50             | 1.80             | 2.19             | 2.67             | 3.26             | 3.74             | 4.29               |
| 28             | 1.24              | 1.38            | 1.55             | 1.86             | 2.26             | 2.76             | 3.37             | 3.87             | 4.44               |
| 29             | 1.29              | 1.43            | 1.60             | 1.92             | 2.34             | 2.85             | 3.49             | 4.01             | 4.61               |
| 30             | 1.33              | 1.48            | 1.66             | 1.99             | 2.41             | 2.95             | 3.61             | 4.15             | 4.77               |
| 31             | 1.38              | 1.53            | 1.71             | 2.06             | 2.5              | 3.05             | 3.73             | 4.29             | 4.95               |
| 32             | 1.42              | 1.58            | 1.77             | 2.13             | 2.58             | 3.15             | 3.86             | 4.45             | 5.13               |
| 33             | 1.47              | 1.63            | 1.83             | 2.20             | 2.67             | 3.26             | 4.00             | 4.60             | 5.31               |
| 34             | 1.52              | 1.69            | 1.89             | 2.27             | 2.76             | 3.37             | 4.13             | 4.76             | 5.50               |
| 35             | 1.58              | 1.75            | 1.96             | 2.35             | 2.85             | 3.48             | 4.27             | 4.93             | 5.70               |
| 36             | 1.63              | 1.81            | 2.02             | 2.43             | 2.94             | 3.60             | 4.42             | 5.10             | 5.90               |
| 37             | 1.68              | 1.87            | 2.09             | 2.51             | 3.04             | 3.72             | 4.57             | 5.27             | 6.11               |
| 38             | 1.74              | 1.93            | 2.16             | 2.59             | 3.14             | 3.84             | 4.72             | 5.45             | 6.33               |
| 39             | 1.80              | 1.99            | 2.23             | 2.67             | 3.24             | 3.97             | 4.88             | 5.64             | 6.55               |
| 40             | 1.86              | 2.06            | 2.30             | 2.76             | 3.35             | 4.10             | 5.04             | 5.83             | 6.78               |

<sup>1</sup>reference range for non-pregnant women: <2.00mmol/L [21]

**Table S 4. Non-fasting Cystatin C<sup>1</sup> percentiles for Indigenous Australian women during pregnancy**

| <b>Gestation week</b> | <b>2.5<sup>th</sup></b> | <b>5<sup>th</sup></b> | <b>10<sup>th</sup></b> | <b>25<sup>th</sup></b> | <b>50<sup>th</sup></b> | <b>75<sup>th</sup></b> | <b>90<sup>th</sup></b> | <b>95<sup>th</sup></b> | <b>97.5<sup>th</sup></b> |
|-----------------------|-------------------------|-----------------------|------------------------|------------------------|------------------------|------------------------|------------------------|------------------------|--------------------------|
| 12                    | 0.53                    | 0.56                  | 0.60                   | 0.65                   | 0.72                   | 0.78                   | 0.86                   | 0.91                   | 0.97                     |
| 13                    | 0.53                    | 0.56                  | 0.59                   | 0.65                   | 0.71                   | 0.78                   | 0.86                   | 0.91                   | 0.97                     |
| 14                    | 0.53                    | 0.56                  | 0.59                   | 0.65                   | 0.71                   | 0.78                   | 0.86                   | 0.91                   | 0.97                     |
| 15                    | 0.52                    | 0.55                  | 0.59                   | 0.65                   | 0.71                   | 0.78                   | 0.86                   | 0.91                   | 0.97                     |
| 16                    | 0.52                    | 0.55                  | 0.59                   | 0.64                   | 0.71                   | 0.78                   | 0.86                   | 0.92                   | 0.98                     |
| 17                    | 0.52                    | 0.55                  | 0.59                   | 0.64                   | 0.71                   | 0.78                   | 0.86                   | 0.92                   | 0.98                     |
| 18                    | 0.52                    | 0.55                  | 0.59                   | 0.65                   | 0.71                   | 0.78                   | 0.87                   | 0.93                   | 0.99                     |
| 19                    | 0.52                    | 0.55                  | 0.59                   | 0.65                   | 0.71                   | 0.79                   | 0.87                   | 0.94                   | 1.00                     |
| 20                    | 0.52                    | 0.56                  | 0.59                   | 0.65                   | 0.72                   | 0.79                   | 0.88                   | 0.95                   | 1.02                     |
| 21                    | 0.53                    | 0.56                  | 0.60                   | 0.66                   | 0.73                   | 0.80                   | 0.89                   | 0.96                   | 1.03                     |
| 22                    | 0.53                    | 0.56                  | 0.60                   | 0.66                   | 0.73                   | 0.81                   | 0.91                   | 0.98                   | 1.05                     |
| 23                    | 0.54                    | 0.57                  | 0.61                   | 0.67                   | 0.74                   | 0.82                   | 0.92                   | 0.99                   | 1.07                     |
| 24                    | 0.55                    | 0.58                  | 0.62                   | 0.68                   | 0.75                   | 0.84                   | 0.94                   | 1.01                   | 1.09                     |
| 25                    | 0.55                    | 0.59                  | 0.63                   | 0.69                   | 0.77                   | 0.85                   | 0.95                   | 1.03                   | 1.11                     |
| 26                    | 0.56                    | 0.60                  | 0.64                   | 0.70                   | 0.78                   | 0.87                   | 0.97                   | 1.05                   | 1.14                     |
| 27                    | 0.57                    | 0.61                  | 0.65                   | 0.72                   | 0.80                   | 0.89                   | 1.00                   | 1.08                   | 1.17                     |
| 28                    | 0.59                    | 0.62                  | 0.66                   | 0.73                   | 0.81                   | 0.91                   | 1.02                   | 1.11                   | 1.20                     |
| 29                    | 0.60                    | 0.64                  | 0.68                   | 0.75                   | 0.83                   | 0.93                   | 1.05                   | 1.14                   | 1.24                     |
| 30                    | 0.62                    | 0.65                  | 0.70                   | 0.77                   | 0.86                   | 0.95                   | 1.08                   | 1.17                   | 1.28                     |
| 31                    | 0.63                    | 0.67                  | 0.71                   | 0.79                   | 0.88                   | 0.98                   | 1.11                   | 1.21                   | 1.32                     |
| 32                    | 0.65                    | 0.69                  | 0.73                   | 0.81                   | 0.90                   | 1.01                   | 1.14                   | 1.25                   | 1.37                     |
| 33                    | 0.67                    | 0.71                  | 0.76                   | 0.84                   | 0.93                   | 1.04                   | 1.18                   | 1.29                   | 1.42                     |
| 34                    | 0.69                    | 0.73                  | 0.78                   | 0.86                   | 0.96                   | 1.08                   | 1.22                   | 1.34                   | 1.47                     |
| 35                    | 0.71                    | 0.76                  | 0.81                   | 0.89                   | 0.99                   | 1.11                   | 1.26                   | 1.39                   | 1.53                     |
| 36                    | 0.74                    | 0.78                  | 0.83                   | 0.92                   | 1.03                   | 1.15                   | 1.31                   | 1.44                   | 1.59                     |
| 37                    | 0.76                    | 0.81                  | 0.86                   | 0.96                   | 1.06                   | 1.19                   | 1.36                   | 1.49                   | 1.65                     |
| 38                    | 0.79                    | 0.84                  | 0.89                   | 0.99                   | 1.10                   | 1.23                   | 1.41                   | 1.55                   | 1.72                     |
| 39                    | 0.82                    | 0.87                  | 0.93                   | 1.02                   | 1.14                   | 1.28                   | 1.46                   | 1.62                   | 1.79                     |
| 40                    | 0.85                    | 0.90                  | 0.96                   | 1.06                   | 1.18                   | 1.33                   | 1.52                   | 1.68                   | 1.87                     |

<sup>1</sup>reference range for non-pregnant women: <2.00mmol/L [21]

**Table S 5. Non-fasting ALP<sup>1</sup> percentiles for Indigenous Australian women during pregnancy aged 16 to less than 22 years**

| Gestation week | 2.5 <sup>th</sup> | 5 <sup>th</sup> | 10 <sup>th</sup> | 25 <sup>th</sup> | 50 <sup>th</sup> | 75 <sup>th</sup> | 90 <sup>th</sup> | 95 <sup>th</sup> | 97.5 <sup>th</sup> |
|----------------|-------------------|-----------------|------------------|------------------|------------------|------------------|------------------|------------------|--------------------|
| 12             | 42.40             | 44.61           | 47.37            | 52.56            | 59.49            | 68.28            | 78.88            | 87.36            | 97.06              |
| 13             | 42.15             | 44.44           | 47.27            | 52.62            | 59.75            | 68.79            | 79.68            | 88.39            | 98.32              |
| 14             | 42.00             | 44.36           | 47.29            | 52.82            | 60.18            | 69.51            | 80.74            | 89.72            | 99.94              |
| 15             | 41.96             | 44.40           | 47.44            | 53.17            | 60.80            | 70.47            | 82.10            | 91.39            | 101.95             |
| 16             | 42.03             | 44.58           | 47.74            | 53.70            | 61.64            | 71.69            | 83.78            | 93.42            | 104.38             |
| 17             | 42.25             | 44.91           | 48.21            | 54.43            | 62.72            | 73.21            | 85.81            | 95.86            | 107.26             |
| 18             | 42.61             | 45.40           | 48.86            | 55.38            | 64.06            | 75.04            | 88.23            | 98.73            | 110.64             |
| 19             | 43.15             | 46.08           | 49.72            | 56.57            | 65.69            | 77.22            | 91.06            | 102.07           | 114.55             |
| 20             | 43.87             | 46.96           | 50.80            | 58.01            | 67.62            | 79.76            | 94.32            | 105.91           | 119.02             |
| 21             | 44.80             | 48.06           | 52.11            | 59.73            | 69.88            | 82.69            | 98.06            | 110.28           | 124.09             |
| 22             | 45.94             | 49.40           | 53.68            | 61.75            | 72.48            | 86.04            | 102.3            | 115.21           | 129.79             |
| 23             | 47.32             | 50.98           | 55.53            | 64.08            | 75.47            | 89.84            | 107.06           | 120.73           | 136.17             |
| 24             | 48.95             | 52.84           | 57.67            | 66.76            | 78.85            | 94.11            | 112.38           | 126.88           | 143.24             |
| 25             | 50.84             | 54.98           | 60.12            | 69.78            | 82.64            | 98.87            | 118.29           | 133.69           | 151.06             |
| 26             | 53.02             | 57.42           | 62.90            | 73.19            | 86.88            | 104.15           | 124.82           | 141.20           | 159.65             |
| 27             | 55.49             | 60.19           | 66.02            | 76.99            | 91.58            | 109.98           | 131.99           | 149.42           | 169.05             |
| 28             | 58.28             | 63.29           | 69.51            | 81.21            | 96.77            | 116.38           | 139.84           | 158.4            | 179.30             |
| 29             | 61.39             | 66.74           | 73.38            | 85.86            | 102.46           | 123.38           | 148.39           | 168.17           | 190.43             |
| 30             | 64.86             | 70.56           | 77.65            | 90.97            | 108.68           | 131.00           | 157.67           | 178.76           | 202.48             |
| 31             | 68.68             | 74.77           | 82.34            | 96.56            | 115.46           | 139.27           | 167.72           | 190.21           | 215.48             |
| 32             | 72.88             | 79.39           | 87.46            | 102.64           | 122.81           | 148.22           | 178.56           | 202.53           | 229.46             |
| 33             | 77.48             | 84.42           | 93.04            | 109.23           | 130.76           | 157.87           | 190.22           | 215.78           | 244.47             |
| 34             | 82.49             | 89.89           | 99.09            | 116.37           | 139.32           | 168.24           | 202.73           | 229.97           | 260.54             |
| 35             | 87.92             | 95.82           | 105.62           | 124.05           | 148.53           | 179.36           | 216.13           | 245.15           | 277.70             |
| 36             | 93.79             | 102.22          | 112.67           | 132.31           | 158.41           | 191.26           | 230.43           | 261.34           | 295.98             |
| 37             | 100.13            | 109.10          | 120.24           | 141.17           | 168.97           | 203.96           | 245.67           | 278.57           | 315.43             |
| 38             | 106.93            | 116.49          | 128.35           | 150.64           | 180.24           | 217.49           | 261.88           | 296.88           | 336.09             |
| 39             | 114.23            | 124.40          | 137.02           | 160.74           | 192.24           | 231.87           | 279.09           | 316.31           | 357.97             |
| 40             | 122.03            | 132.85          | 146.28           | 171.50           | 205.00           | 247.13           | 297.32           | 336.87           | 381.13             |

<sup>1</sup>reference range for non-pregnant women: <35-140 U/L (16<22 yrs) [21]

**Table S 6. Non-fasting ALP<sup>1</sup> percentiles for Indigenous Australian women during pregnancy aged 22 years and older**

| Gestation week | 2.5 <sup>th</sup> | 5 <sup>th</sup> | 10 <sup>th</sup> | 25 <sup>th</sup> | 50 <sup>th</sup> | 75 <sup>th</sup> | 90 <sup>th</sup> | 95 <sup>th</sup> | 97.5 <sup>th</sup> |
|----------------|-------------------|-----------------|------------------|------------------|------------------|------------------|------------------|------------------|--------------------|
| 12             | 30.64             | 34.92           | 39.89            | 48.29            | 57.76            | 67.38            | 76.16            | 81.48            | 86.14              |
| 13             | 30.86             | 35.10           | 40.05            | 48.47            | 58.07            | 67.92            | 77.03            | 82.59            | 87.48              |
| 14             | 31.07             | 35.29           | 40.24            | 48.73            | 58.48            | 68.61            | 78.06            | 83.88            | 89.04              |
| 15             | 31.30             | 35.53           | 40.50            | 49.08            | 59.03            | 69.46            | 79.29            | 85.39            | 90.83              |
| 16             | 31.57             | 35.82           | 40.84            | 49.55            | 59.73            | 70.49            | 80.74            | 87.15            | 92.89              |
| 17             | 31.89             | 36.18           | 41.28            | 50.15            | 60.59            | 71.73            | 82.43            | 89.18            | 95.26              |
| 18             | 32.28             | 36.64           | 41.83            | 50.90            | 61.64            | 73.20            | 84.40            | 91.51            | 97.96              |
| 19             | 32.77             | 37.21           | 42.51            | 51.81            | 62.90            | 74.92            | 86.66            | 94.17            | 101.03             |
| 20             | 33.37             | 37.91           | 43.33            | 52.90            | 64.38            | 76.91            | 89.25            | 97.20            | 104.49             |
| 21             | 34.10             | 38.76           | 44.33            | 54.21            | 66.11            | 79.20            | 92.19            | 100.63           | 108.40             |
| 22             | 34.98             | 39.77           | 45.51            | 55.73            | 68.12            | 81.81            | 95.52            | 104.47           | 112.78             |
| 23             | 36.02             | 40.96           | 46.90            | 57.50            | 70.41            | 84.78            | 99.26            | 108.78           | 117.66             |
| 24             | 37.25             | 42.36           | 48.52            | 59.53            | 73.01            | 88.11            | 103.43           | 113.58           | 123.09             |
| 25             | 38.68             | 43.98           | 50.37            | 61.85            | 75.96            | 91.84            | 108.08           | 118.9            | 129.11             |
| 26             | 40.33             | 45.84           | 52.5             | 64.47            | 79.26            | 96.00            | 113.23           | 124.78           | 135.74             |
| 27             | 42.23             | 47.96           | 54.90            | 67.42            | 82.94            | 100.60           | 118.90           | 131.26           | 143.03             |
| 28             | 44.39             | 50.36           | 57.62            | 70.72            | 87.03            | 105.68           | 125.14           | 138.36           | 151.02             |
| 29             | 46.83             | 53.07           | 60.65            | 74.39            | 91.54            | 111.27           | 131.97           | 146.12           | 159.75             |
| 30             | 49.58             | 56.10           | 64.04            | 78.45            | 96.51            | 117.39           | 139.42           | 154.58           | 169.27             |
| 31             | 52.65             | 59.48           | 67.80            | 82.93            | 101.96           | 124.06           | 147.53           | 163.77           | 179.60             |
| 32             | 56.06             | 63.21           | 71.94            | 87.85            | 107.92           | 131.32           | 156.33           | 173.73           | 190.79             |
| 33             | 59.84             | 67.34           | 76.50            | 93.23            | 114.40           | 139.20           | 165.85           | 184.51           | 202.90             |
| 34             | 64.01             | 71.87           | 81.49            | 99.09            | 121.43           | 147.72           | 176.12           | 196.12           | 215.95             |
| 35             | 68.58             | 76.84           | 86.94            | 105.46           | 129.05           | 156.90           | 187.18           | 208.62           | 230.00             |
| 36             | 73.59             | 82.26           | 92.88            | 112.37           | 137.27           | 166.79           | 199.05           | 222.04           | 245.08             |
| 37             | 79.05             | 88.15           | 99.31            | 119.84           | 146.12           | 177.41           | 211.79           | 236.42           | 261.26             |
| 38             | 84.98             | 94.54           | 106.27           | 127.88           | 155.63           | 188.79           | 225.41           | 251.80           | 278.56             |
| 39             | 91.41             | 101.45          | 113.78           | 136.54           | 165.82           | 200.95           | 239.95           | 268.22           | 297.05             |
| 40             | 98.36             | 108.91          | 121.87           | 145.82           | 176.73           | 213.94           | 255.45           | 285.72           | 316.76             |

<sup>1</sup>reference range for non-pregnant women: <30-110 U/L(22<120 yrs) [21]

**Table S 7. Percentile bands for hs-CRP and GGT during pregnancy for Indigenous Australian women**

| Inflamm-atory Marker | Unit   | 2.5 <sup>th</sup> | 5 <sup>th</sup> | 10 <sup>th</sup> | 25 <sup>th</sup> | 50 <sup>th</sup> | 75 <sup>th</sup> | 90 <sup>th</sup> | 95 <sup>th</sup> | 97.5 <sup>th</sup> |
|----------------------|--------|-------------------|-----------------|------------------|------------------|------------------|------------------|------------------|------------------|--------------------|
| hsCRP <sup>1</sup>   | (mg/L) | 0.50              | 0.90            | 1.50             | 3.00             | 6.00             | 10.00            | 18.00            | 25.00            | 34.60              |
| GGT <sup>2</sup>     | (U/L)  | 5.0               | 5.0             | 6.0              | 8.0              | 11.0             | 16.0             | 26.0             | 37.0             | 52.0               |

1 Reference range for non-pregnant women: 1.00-3.00 mg/L.

2 Reference range for non-pregnant women: 9-36 U/L

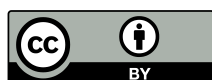

Supplement: healthcare-05-00072-s001.pdf [file healthcare-05-00072-s001.pdf]
